# Supplementary material for: The MEF2D transcription factor mediates stress-dependent cardiac remodeling in mice
Source: JCI journal article supplement (doi:10.1172/jci33255), 2008-01-02
Supplement: sd1 [file 1]

**Supplemental Table 1. Statistical analysis between WT and *Mef2d* mutant mice**

| Echocardiogram     |                   | Fetal gene expression   |                   |
|--------------------|-------------------|-------------------------|-------------------|
| Parameters         | p values          | Genes                   | p values          |
| LVIDd <sup>A</sup> | <0.7 <sup>B</sup> | <i>ANP</i> <sup>C</sup> | <1.0 <sup>D</sup> |
| LVIDs              | <0.005            | <i>BNP</i>              | <0.08             |
| FS                 | <0.005            | <i>Myh6</i>             | <1.0              |
| HR                 | <0.3              | <i>Myh7</i>             | <0.4              |
| AWd                | <0.6              | <i>Acta1</i>            | <0.09             |
| PWd                | <0.2              | <i>Ctgf</i>             | <0.5              |
|                    |                   | <i>Colla2</i>           | <0.9              |
|                    |                   | <i>Col3a1</i>           | <0.5              |
|                    |                   | <i>Mef2a</i>            | <0.7              |

<sup>A</sup>LVIDd, left ventricular end-diastolic diameter; LVIDs, left ventricular end-systolic diameter; FS, fractional shortening; HR, heart rate; AWd, anterior wall thickness in diastole; PWd, posterior wall thickness in diastole.

<sup>B</sup>These p values relate to Table 1 and Figure 3.

<sup>C</sup>*ANP*, atrial natriuretic peptide; *BNP*, brain natriuretic peptide; *Myh6*, myosin, heavy polypeptide 6, cardiac muscle, alpha; *Myh7*, myosin, heavy polypeptide 7, cardiac muscle, beta; *Acta1*, actin, alpha 1, skeletal muscle; *Ctgf*, connective tissue growth factor; *Colla2*, procollagen, type I, alpha 2; *Col3a1*, procollagen, type III, alpha 1; *Mef2a*, myocyte enhancer factor-2a.

<sup>D</sup>These p values relate to Figure 4.

## Supplemental Methods

### Tissue culture and transfection

COS-7 cells were grown in Dulbecco's Modified Eagle's Medium supplemented with 10% fetal bovine serum. Fugene 6 (Roche) was used for transient transfection assay according to the manufacturer's instructions. A luciferase reporter plasmid containing three copies of a high-affinity MEF2 binding site and a mammalian expression construct of MEF2A have been previously described (39). A coding sequence of MEF2D $\Delta$ (18-86) was generated by PCR and ligated into pcDNA 3.1 (Invitrogen) to generate the expression construct. Plasmids were co-transfected with 10 ng of a CMV- $\beta$ -galactosidase reporter plasmid to control for transfection efficiency.

### Supplemental Figure

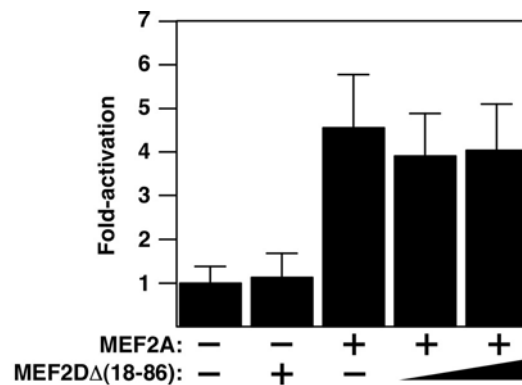

**Figure S1.** COS-7 cells were cotransfected with a MEF2-dependent luciferase reporter and expression vectors of MEF2A and MEF2D $\Delta$ (18-86) to demonstrate that the presence of mutant MEF2D protein has a minimal effect on MEF2 activity. Error bars indicate one standard deviation.
